# Supplementary material
Source: HighWire-hosted journal article supplement (https://cmaj.ca/highwire/filestream/151053/field_highwire_adjunct_files/0/231640-res-1-at.pdf)
Supplement: 231640-res-1-at.pdf [file 231640-res-1-at.pdf]

Supplemental Table 1. Baseline characteristics of included, missed by physician, unreachable, refused to participate, and lost to the 14-day follow-up patients.

| Baseline characteristics                               | Missed by physician (N=1,652) | Unreachable (N=1,661) | Refused to participate (N=1,782) | Lost to follow-up (N=350) | Included patients (N=2,240) |
|--------------------------------------------------------|-------------------------------|-----------------------|----------------------------------|---------------------------|-----------------------------|
| Mean ( $\pm$ SD) age                                   | 50.0 (17.7)                   | 45.8 (15.8)           | 52.6 (17.8)                      | 49.8 (17.5)               | 50.5 (15.5)                 |
| Female (%)                                             | 50.3                          | 48.7                  | 51.1                             | 50.0                      | 48.2                        |
| Mean ( $\pm$ SD) pain intensity (0-10 scale) at triage | 7.2 (2.1)                     | 7.2 (2.3)             | 7.0 (2.3)                        | 7.1 (2.3)                 | 7.1 (2.2)                   |
| Type of pain conditions (%)                            |                               |                       |                                  |                           |                             |
| -Renal colic                                           | 14.6                          | 15.9                  | 14.4                             | 12.0                      | 19.1                        |
| -Fracture                                              | 22.5                          | 18.7                  | 21.9                             | 19.2                      | 23.7                        |
| -Back pain                                             | 11.7                          | 18.3                  | 16.5                             | 22.9                      | 16.7                        |
| -Neck pain                                             | 2.4                           | 3.0                   | 2.9                              | 2.6                       | 2.9                         |
| -Musculoskeletal                                       | 15.3                          | 20.6                  | 21.3                             | 19.5                      | 18.5                        |
| -Abdominal pain                                        | 13.1                          | 10.3                  | 8.2                              | 8.3                       | 7.4                         |
| -Other                                                 | 20.4                          | 13.2                  | 14.8                             | 15.5                      | 11.7                        |
| Treated with opioid within the ED stay (%)             | 65.1                          | 62.6                  | 56.7                             | 64.2                      | 60.0                        |
| Median (Q1-Q3) ED stay (hours)                         | 5.4 (3.5-7.9)                 | 5.8 (3.8-8.8)         | 5.8 (3.8-8.6)                    | 5.7 (3.8-8.6)             | 5.7 (3.9-8.5)               |

SD : Standard deviation      Q1-Q3: first and third quartile

Supplemental Table 2. Other baseline characteristics of included patients.

| Baseline characteristics                         | Included patients<br>(N=2,240) |
|--------------------------------------------------|--------------------------------|
| Ethnicity (%)                                    |                                |
| -White                                           | 76.7                           |
| -Middle Eastern/North African                    | 10.5                           |
| -Black                                           | 5.5                            |
| -Hispanic/Spanish/Latino                         | 3.8                            |
| -Asian/Indian                                    | 1.7                            |
| -First Nations                                   | 0.6                            |
| -Other*                                          | 1.2                            |
| Preferred language (%)                           |                                |
| -French                                          | 85.6                           |
| -English                                         | 14.4                           |
| Education (%)                                    |                                |
| -Primary school                                  | 2.7                            |
| -High school                                     | 29.6                           |
| -College                                         | 28.6                           |
| -University                                      | 39.1                           |
| Annual income of your household before taxes (%) |                                |
| -0 - 24 999 \$                                   | 11.8                           |
| -25 000 \$ - 49 999 \$                           | 24.6                           |
| -50 000 \$ - 69 999 \$                           | 16.9                           |
| -70 000 \$ - 99 999 \$                           | 18.3                           |
| -100 000 \$ - 499 999 \$                         | 27.8                           |
| -500 000 \$ or more                              | 0.6                            |

\*Data not available for specific ethnicities of patients who selected the “other” category

Supplemental Table 3. Opioid prescribed and consumed across sex and age during the two-week follow-up.

| Opioid prescribed and consumed                                            | Sex           |                | Age           |                |
|---------------------------------------------------------------------------|---------------|----------------|---------------|----------------|
|                                                                           | Male          | Female         | < 65          | ≥ 65           |
| Number of patients                                                        | 1161          | 1079           | 1802          | 438            |
| Filled opioid prescription (%)                                            | 93.0          | 92.2           | 92.7          | 92.0           |
| Filled additional opioid prescription (%)                                 | 10.0          | 11.6           | 11.3          | 8.4            |
| Median (Q1-Q3) number of morphine 5 mg tablet equivalents prescribed      | 16<br>(12-24) | 15<br>(10-20)  | 16<br>(12-23) | 16<br>(10-20)  |
| Median (Q1-Q3) number of morphine 5 mg tablet equivalents consumed (7 d)  | 4.0<br>(1-11) | 4.5<br>(1-11)  | 4<br>(1-11)   | 4.5<br>(1-11)  |
| Median (Q1-Q3) number of morphine 5 mg tablet equivalents consumed (14 d) | 4.5<br>(1-13) | 5.0*<br>(1-13) | 4.8<br>(1-13) | 4.8*<br>(1-12) |
| Percentage of morphine 5 mg tablet equivalents unused (14 d)              | 62.6          | 63.2           | 63.2          | 61.6           |

Q1-Q3: first and third quartile; \*Not statistically significant.

Supplemental Table 4. Main outcomes across the different hospital sites.

| Main outcomes                                                     | Quebec tertiary sites* | Quebec community site* | Ontario tertiary sites* |
|-------------------------------------------------------------------|------------------------|------------------------|-------------------------|
| Filled opioid prescription (%)                                    | 92.9                   | 91.7                   | 90.6                    |
| Median (Q1-Q3) number of morphine 5 mg equivalent prescribed      | 16<br>(12-24)          | 15<br>(10-20)          | 13<br>(10-16)           |
| Median (Q1-Q3) number of morphine 5 mg equivalent consumed (7 d)  | 4<br>(1-11)            | 3<br>(0-9)             | 3<br>(0-9)              |
| Median (Q1-Q3) number of morphine 5 mg equivalent consumed (14 d) | 5<br>(1-15)            | 4<br>(1-12)            | 3<br>(0-11)             |

Q1-Q3: first and third quartile.

\*Quebec tertiary sites: Sacré-Coeur de Montréal, Maisonneuve-Rosemont, Enfant-Jésus hospitals; Quebec community site: Jean-Talon hospital; Ontario tertiary sites: Ottawa, London-Victoria, Sunnybrook Health Sciences Centre hospitals.
